# Supplementary material for: Recent Prospects of Carbonaceous Nanomaterials-Based Laccase Biosensor for Electrochemical Detection of Phenolic Compounds
Source: MDPI journal article supplement (doi:10.3390/bios13030305), 2023-02-22
Supplement: s1 [file s1]

# Recent Prospects of Carbonaceous Nanomaterials-Based Laccase Biosensor for Electrochemical Detection of Phenolic Compounds

Sakshi Verma <sup>1</sup>, Deeksha Thakur <sup>1</sup>, Chandra Mouli Pandey <sup>2,\*</sup> and Devendra Kumar <sup>1,\*</sup>

<sup>1</sup> Department of Applied Chemistry, Delhi Technological University, Delhi 110042, India

<sup>2</sup> Department of Chemistry, Faculty of Science, SGT University, Gurugram 122505, India

\* Correspondence: cmp.npl@gmail.com (C.M.P.); dkumar@dce.ac.in (D.K.)

**Table S1.** Sources of Laccase enzyme.

| Plants                                                                                                                                                                                                                                                                                                                                 | Fungi                                                                                                                                                                                                                                                 |
|----------------------------------------------------------------------------------------------------------------------------------------------------------------------------------------------------------------------------------------------------------------------------------------------------------------------------------------|-------------------------------------------------------------------------------------------------------------------------------------------------------------------------------------------------------------------------------------------------------|
| <ul style="list-style-type: none"> <li>Fruits such as apples, peach, pears etc.</li> <li>Vegetables such as cabbage, potatoes, beets.</li> <li>Other plants like tobacco, sycamore, maize's embryo and many more [1]</li> </ul>                                                                                                        | <ul style="list-style-type: none"> <li>Ascomycetes (Polyporousver-cicolor, Aspergillusnidulan),</li> <li>deuteromycetes (Pestalotiopsis species)</li> <li>basidiomycetes ( white rot fungi, Tremetes fungi etc) are major sources. [2],[3]</li> </ul> |
| Insects                                                                                                                                                                                                                                                                                                                                | Bacteria                                                                                                                                                                                                                                              |
| <ul style="list-style-type: none"> <li>Azospirillumlipoferum (Ist reported)</li> <li>Other insects such as Bacillus subtilis (Gangola, Sharma, Bhatt, Khati, &amp; Chaudhary,2018),Streptomyces cyaneus [4], Streptomycesipomoeae[5], Streptomyces lav-endulae [6], Streptomyces coelicolor [7], and Thermusthermophilus[8]</li> </ul> | <ul style="list-style-type: none"> <li>In particular Azospiril-lumlipoferum, Pseudomonas putida F6,Bacillus licheniformis, Bacillus subtilis WPI [9]</li> </ul>                                                                                       |

**Table S2.** Doping materials used in carbon matrices.

| S.No. | Matrix material        | Doping materials                                   | References  |
|-------|------------------------|----------------------------------------------------|-------------|
| 1.    | Carbon black           | PANI, Thionine                                     | [10]        |
| 2.    | Carbon quantum dots    | F, N                                               | [11]        |
| 3.    | Graphite               | Epoxy, PVA, Ferrocene                              | [12-14]     |
| 4.    | Graphene               | PANI, Au, Pt                                       | [15-17]     |
| 5.    | Graphene oxide         | Rh, PEDOT                                          | [18, 19]    |
| 6.    | Reduced graphene oxide | Pd/Cu, Sb <sub>2</sub> O <sub>5</sub> , Pt, PVP/CS | [15, 20-22] |
| 7.    | Carbon nano fibers     | TiO <sub>2</sub>                                   | [23]        |
| 8.    | Carbon nano tubes      | Cellulose, CS, Ni/PANI, MnO <sub>2</sub> , Au      | [24-28]     |
| 9.    | Graphene quantum dots  | MoS <sub>2</sub>                                   | [29]        |

## References

- Kumar, V. and P. Sonkar, *LACCASES: SOURCES AND THEIR ENVIRONMENTAL APPLICATION*. International Journal of Bioassays, 2013. **2**: p. 909-911.
- Viswanath, B., et al., *Fungal Laccases and Their Applications in Bioremediation*. Enzyme Research, 2014. **2014**: p. 163242.
- Shraddha, et al., *Laccase: Microbial Sources, Production, Purification, and Potential Biotechnological Applications*. Enzyme Research, 2011. **2011**: p. 217861.

4. Ece, S., et al., *Heterologous expression of a Streptomyces cyaneus laccase for biomass modification applications*. AMB Express, 2017. **7**(1): p. 86-86.
5. Blázquez, A., et al., *Laccase SilA from Streptomyces ipomoeae CECT 3341, a key enzyme for the degradation of lignin from agricultural residues?* PloS one, 2017. **12**(11): p. e0187649-e0187649.
6. Mishra, S. and D.S. Srivastava, *Production and Optimization of Laccase from Streptomyces lavendulae*. International Journal of Current Microbiology and Applied Sciences (IJCMAS), 2017. **6**: p. 1239-1246.
7. Majumdar, S., et al., *Roles of Small Laccases from Streptomyces in Lignin Degradation*. Biochemistry, 2014. **53**(24): p. 4047-4058.
8. Miyazaki, K., *A hyperthermophilic laccase from Thermus thermophilus HB27*. Extremophiles, 2005. **9**(6): p. 415-425.
9. Chauhan, P.S., B. Goradia, and A. Saxena, *Bacterial laccase: recent update on production, properties and industrial applications*. 3 Biotech, 2017. **7**(5): p. 323-323.
10. !!! INVALID CITATION !!! .
11. Liu, L., et al., *Electrochemical sensor based on F,N-doped carbon dots decorated laccase for detection of catechol*. Journal of Electroanalytical Chemistry, 2019. **840**: p. 84-92.
12. Cetó, X., F. Céspedes, and M. del Valle, *BioElectronic Tongue for the quantification of total polyphenol content in wine*. Talanta, 2012. **99**: p. 544-551.
13. Ibarra-Escutia, P., et al., *Amperometric biosensor based on a high resolution photopolymer deposited onto a screen-printed electrode for phenolic compounds monitoring in tea infusions*. Talanta, 2010. **81**(4): p. 1636-1642.
14. Montoreali, M.R., et al., *A disposable Laccase-Tyrosinase based biosensor for amperometric detection of phenolic compounds in must and wine*. Journal of Molecular Catalysis B: Enzymatic, 2010. **64**(3): p. 189-194.
15. Eremia, S.A.V., et al., *Disposable biosensor based on platinum nanoparticles-reduced graphene oxide-laccase biocomposite for the determination of total polyphenolic content*. Talanta, 2013. **110**: p. 164-170.
16. Lou, C., et al., *Laccase immobilized polyaniline/magnetic graphene composite electrode for detecting hydroquinone*. Int J Biol Macromol, 2020. **149**: p. 1130-1138.
17. Zrinski, I., et al., *Evaluation of phenolic antioxidant capacity in beverages based on laccase immobilized on screen-printed carbon electrode modified with graphene nanoplatelets and gold nanoparticles*. Microchemical Journal, 2020. **152**: p. 104282.
18. Maleki, N., et al., *A Novel Enzyme Based Biosensor for Catechol Detection in Water Samples Using Artificial Neural Network*. Biochemical Engineering Journal, 2017. **128**.
19. Povedano, E., et al., *Decoration of reduced graphene oxide with rhodium nanoparticles for the design of a sensitive electrochemical enzyme biosensor for 17 $\beta$ -estradiol*. Biosensors and Bioelectronics, 2017. **89**: p. 343-351.
20. Cincotto, F.H., et al., *Reduced graphene oxide-Sb<sub>2</sub>O<sub>5</sub> hybrid nanomaterial for the design of a laccase-based amperometric biosensor for estriol*. Electrochimica Acta, 2015. **174**: p. 332-339.
21. Mei, L.-P., et al., *Novel phenol biosensor based on laccase immobilized on reduced graphene oxide supported palladium-copper alloyed nanocages*. Biosensors and Bioelectronics, 2015. **74**: p. 347-352.
22. Pavinatto, A., et al., *Ultrasensitive biosensor based on polyvinylpyrrolidone/chitosan/reduced graphene oxide electrospun nanofibers for 17 $\alpha$  - Ethinylestradiol electrochemical detection*. Applied Surface Science, 2018. **458**: p. 431-437.
23. Yang, J., et al., *TiO<sub>2</sub>-CuCNFs based laccase biosensor for enhanced electrocatalysis in hydroquinone detection*. Journal of Electroanalytical Chemistry, 2016. **766**: p. 16-23.
24. Chawla, S., et al., *An amperometric biosensor based on laccase immobilized onto nickel nanoparticles/carboxylated multiwalled carbon nanotubes/polyaniline modified gold electrode for determination of phenolic content in fruit juices*. Biochemical Engineering Journal, 2012. **68**: p. 76-84.
25. Diaconu, M., S.C. Litescu, and G.L. Radu, *Laccase-MWCNT-chitosan biosensor—A new tool for total polyphenolic content evaluation from in vitro cultivated plants*. Sensors and Actuators B: Chemical, 2010. **145**(2): p. 800-806.
26. El Ichi-Ribault, S., et al., *Performance and stability of chitosan-MWCNTs-laccase biocathode: Effect of MWCNTs surface charges and ionic strength*. Journal of Electroanalytical Chemistry, 2017. **799**: p. 26-33.
27. Li, X., et al., *Encapsulation of enzyme by metal-organic framework for single-enzymatic biofuel cell-based self-powered biosensor*. Nano Energy, 2020. **68**: p. 104308.
28. Rawal, R., et al., *An amperometric biosensor based on laccase immobilized onto MnO<sub>2</sub>NPs/cMWCNT/PANI modified Au electrode*. International Journal of Biological Macromolecules, 2012. **51**(1): p. 175-181.
29. Vasilescu, I., et al., *Molybdenum disulphide and graphene quantum dots as electrode modifiers for laccase biosensor*. Biosensors and Bioelectronics, 2016. **75**: p. 232-237.
